# Supplementary material
Source: PubMed Central journal article supplement (PMC3998206)
Supplement: NIHMS572646-supplement-Supplementary.pdf [file NIHMS572646-supplement-Supplementary.pdf]

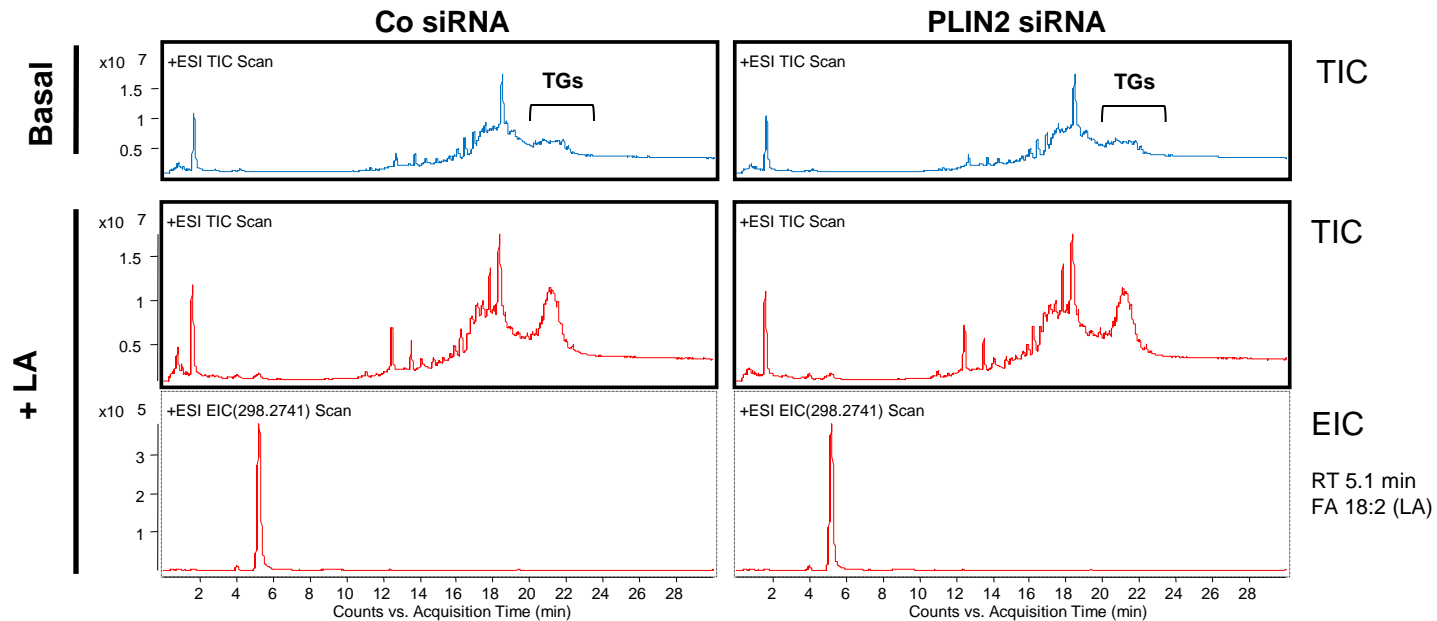

**Supplementary Figure 1.** Total ion chromatograms (TICs) obtained by high performance liquid chromatography coupled with electrospray ionization and time of flight mass spectrometry (RRRP/ HPLC-ESI-ToF/MS) representative of analyses in positive ion mode of control and PLIN2 siRNA SZ95 cells in basal (blue TICs) and LA-added (red TICs) culture conditions. EICs of FA 18:2 ( $[M+NH_4]^+$ ,  $m/z$  298.2741) indicating that LA abundance was similar in control and PLIN2 siRNA-treated SZ95 sebocytes following LA treatment.
